# Supplementary material for: Corrosive engineering assistedin situconstruction of an Fe–Ni-based compound for industrial overall water-splitting under large-current density in alkaline freshwater and seawater media
Source: Royal Society of Chemistry journal article supplement (doi:10.1039/d2ta07586e), 2022-12-20
Supplement: d2ta07586e2.pdf [file d2ta07586e2.pdf]

# **Corrosive Engineering Assisted to In-situ Construct Fe-Ni-based Compound for Industrial Overall Water-splitting Under Large-current Density in Alkaline Fresh water and Seawater Media**

Yue Wang<sup>a</sup>, Wenli Yu<sup>a</sup>, Bowen Zhou<sup>a, f</sup>, Weiping Xiao<sup>b</sup>, Jinsong Wang<sup>e</sup>, Xiping Wang<sup>a</sup>, Guangrui Xu<sup>d</sup>, Bin Li<sup>d</sup>, Zhenjiang Li<sup>d</sup>, Zexing Wu<sup>a, \*</sup>, Lei Wang<sup>a, c, \*</sup>

*a. Key Laboratory of Eco-chemical Engineering, Ministry of Education, International Science and Technology Cooperation Base of Eco-chemical Engineering and Green Manufacturing, College of Chemistry and Molecular Engineering, Qingdao University of Science and Technology, Qingdao 266042, P. R. China. E-mail: splswzx@qust.edu.cn; inorchemwl@126.com*

*b. College of Science, Nanjing Forestry University, Nanjing, 210037, PR China*

*c. Shandong Engineering Research Center for Marine Environment Corrosion and Safety Protection, College of Environment and Safety Engineering, Qingdao University of Science and Technology, Qingdao, 266042, PR China.*

*d. College of Materials Science and Engineering, Qingdao University of Science and Technology, Qingdao, Shandong province, 266061, PR China.*

*e. Faculty of Materials Science and Engineering, Kunming University of Science and Technology, Kunming 650093, PR China*

*f. Beijing Key Laboratory of Materials Utilization of Nonmetallic Minerals and Solid Wastes, National Laboratory of Mineral Materials, School of Materials Science and Technology, China University of Geosciences, Beijing 100083, PR China*

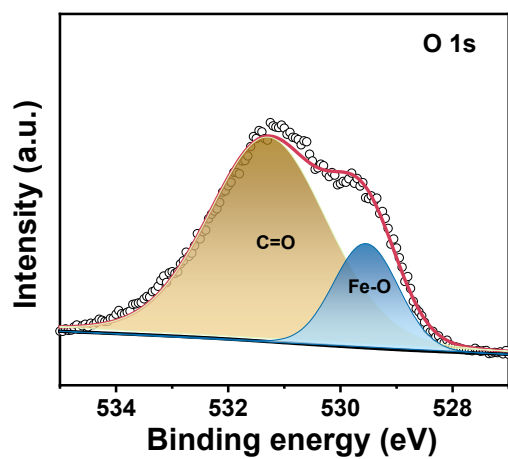

Fig. S1 High-resolution XPS spectra of O 1s.

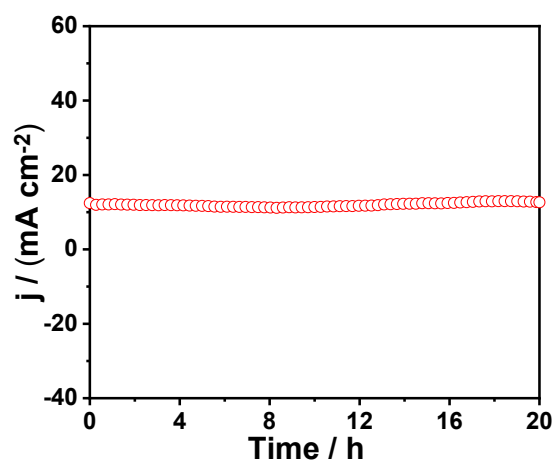

Fig. S2 Long-term stability testing at current densities of  $10 \text{ mA cm}^{-2}$  for Fe-Ni-O-N.

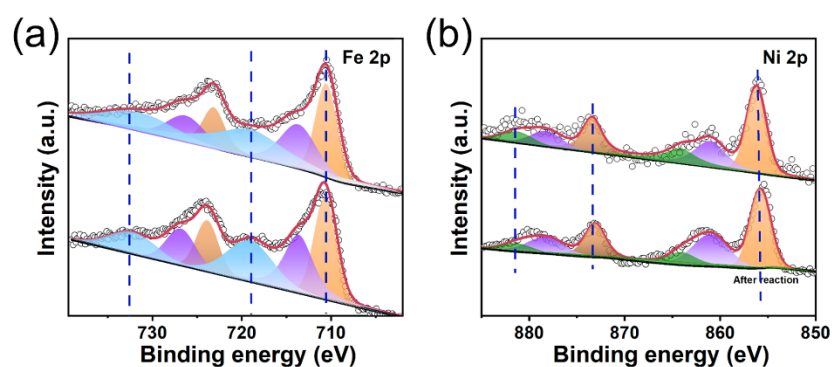

Fig. S3 XPS spectra of Fe-Ni-N-O before and after the test for 70 h at a current density of  $500 \text{ mA cm}^{-2}$  (a) Fe, and (b) Ni in 1M KOH.

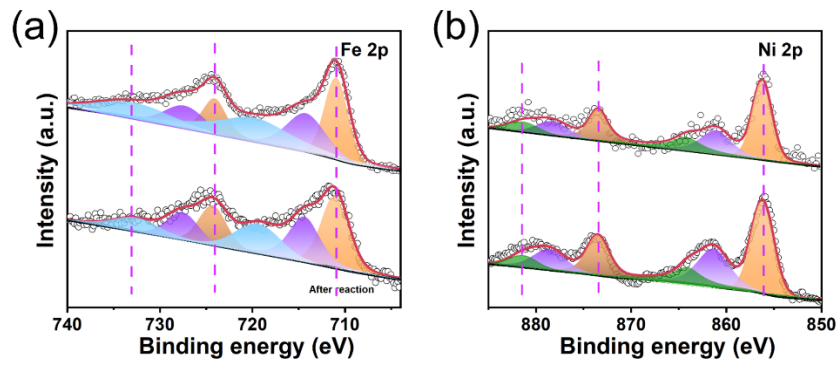

**Fig. S4** XPS spectra of Fe-Ni-N-O before and after the test for 40 h at a current density of 500 mA cm<sup>-2</sup> (a) Fe, and (b) Ni in 1M KOH + seawater.

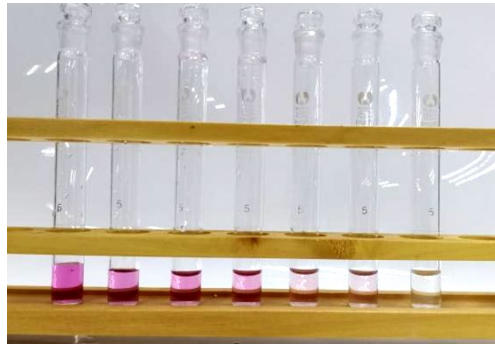

**Fig. S5** Test results of ClO<sup>-</sup> formation in 1 M KOH seawater electrolyte after the corresponding OER stability tests.

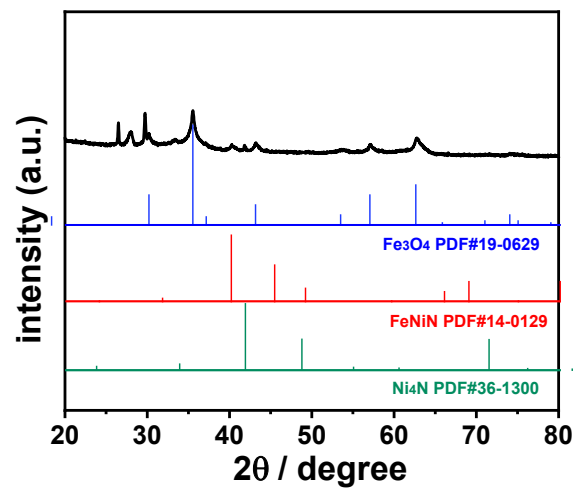

**Fig. S6** XRD patterns of Ru/Fe-Ni-O-N.

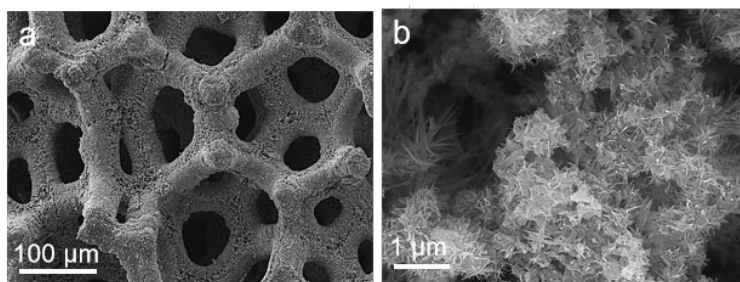

Fig. S7 SEM images of Ru/Fe-Ni-O-N.

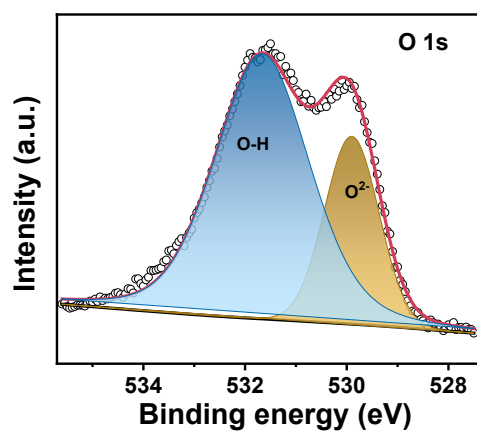

Fig. S8 High-resolution XPS spectra of (a) O 1s.

The binding energy at 531.6 eV is attributed to the O–H bond derived from the surface or internal and 529.9 eV is often associated with the  $O^{2-}$  ion of metal–oxide bonds [1, 2].

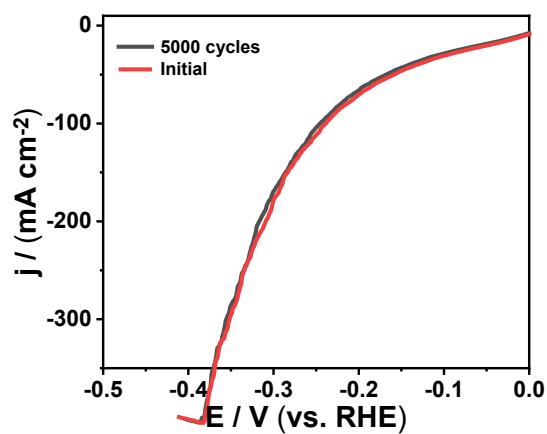

Fig. S9 LSV curves were recorded before and after 5000 CV scans for HER.

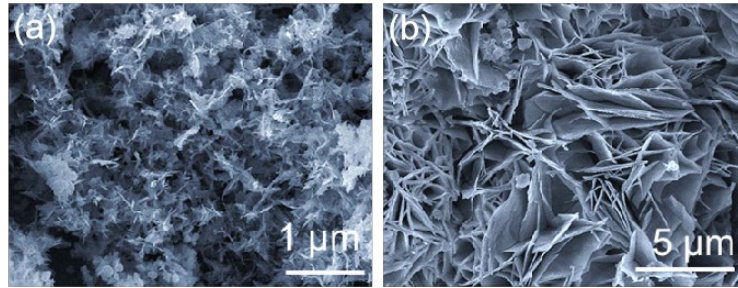

**Fig. S10** SEM images of (a) Fe-Ni-N-O, and (b) Ru/Fe-Ni-O-N after long stabilization at 500 mA cm<sup>-2</sup> current density in 6 M KOH, 60 °C.

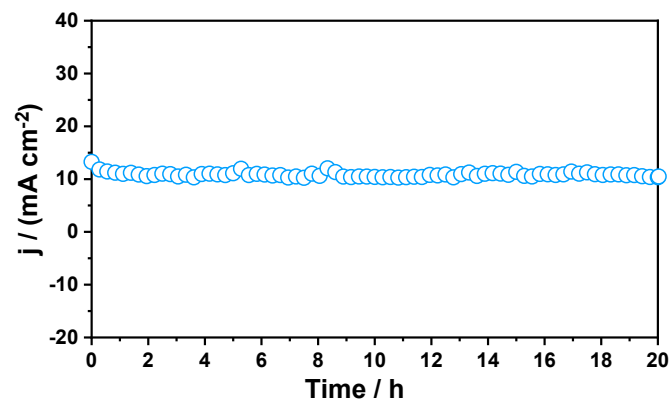

**Fig. S11** Long-term stability testing at current densities of Ru/Fe-Ni-O-N || Fe-Ni-O-N at 10 mA cm<sup>-2</sup> in 1 M KOH + seawater.

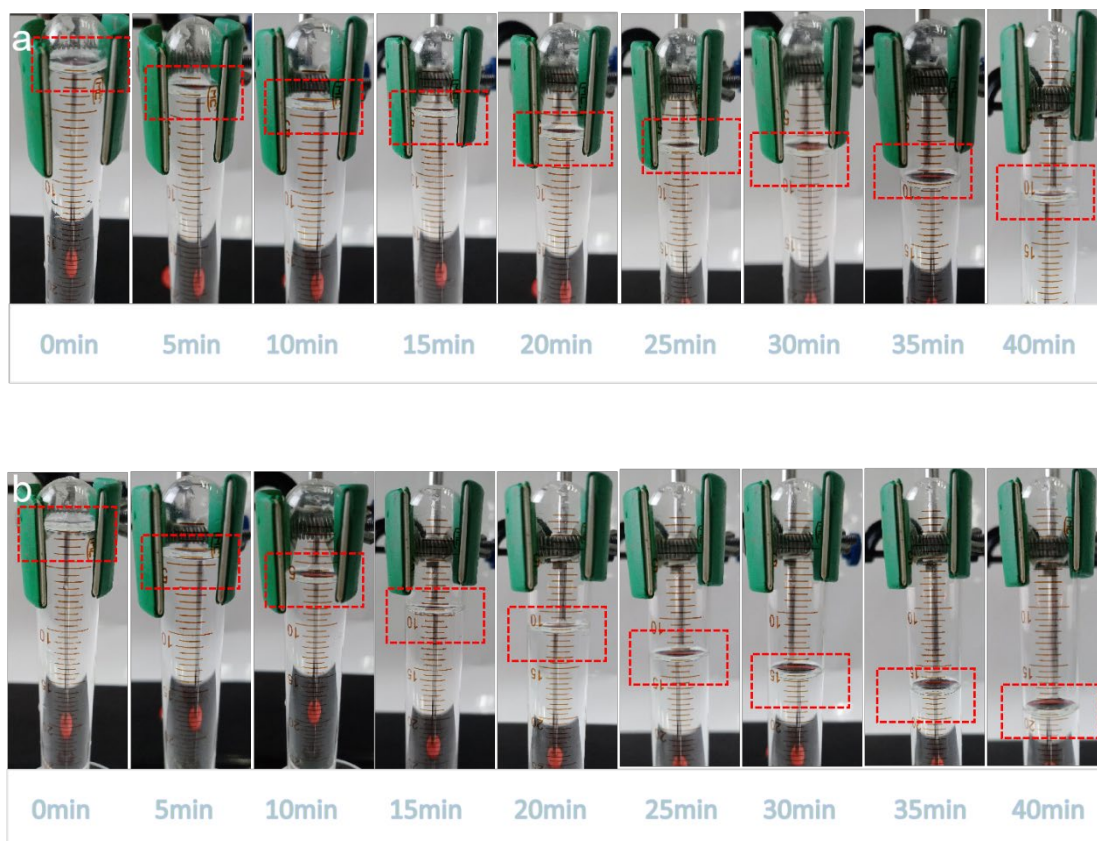

Fig. S12 Photographs of (a) OER and (b) HER collected at different times.

**Table S1** Comparison of the overpotentials of Fe-Ni-O-N, NiFe LDH, NiFe and RuO<sub>2</sub> catalysts at different current densities in 1M KOH and 1M KOH + seawater.

| Catalysts        | Electrolytes     | Overpotential (mV)@10mAcm <sup>-2</sup> | Overpotential (mV)@50mAcm <sup>-2</sup> | Overpotential (mV)@500mA cm <sup>-2</sup> | Overpotential (mV)@1000mA cm <sup>-2</sup> |
|------------------|------------------|-----------------------------------------|-----------------------------------------|-------------------------------------------|--------------------------------------------|
| Fe-Ni-O-N        | 1M KOH           | 189                                     | 206                                     | 260                                       | 280                                        |
| NiFe LDH         |                  | 280                                     | 313                                     | 320                                       | 350                                        |
| RuO <sub>2</sub> |                  | 307                                     | 352                                     | 420                                       | 450                                        |
| NiFe             |                  | 348                                     | 408                                     | 460                                       | 510                                        |
| Fe-Ni-O-N        | 1M KOH+ seawater | 190                                     | 235                                     | 270                                       | 289                                        |
| NiFe LDH         |                  | 227                                     | 289                                     | 296                                       | 338                                        |
| RuO <sub>2</sub> |                  | 294                                     | 360                                     | 389                                       | 410                                        |
| NiFe             |                  | 358                                     | 445                                     | 450                                       | 550                                        |

**Table S2** Comparison of the OER performances reported of other previously reported electrocatalysts in 1 M KOH.

| Catalysts                             | Tafel slope (mV dec <sup>-1</sup> ) | Potential (mV) @ 10mA cm <sup>-2</sup> | References |
|---------------------------------------|-------------------------------------|----------------------------------------|------------|
| Fe-Ni-N-O                             | 25                                  | 1.419                                  | This work  |
| CoMoN <sub>x</sub> -500 NSAs/NF       | 88.2                                | 1.461                                  | [3]        |
| NSP-Ni <sub>3</sub> FeN               | 40                                  | 1.453                                  | [4]        |
| FeNi <sub>3</sub> N/NF                | 40                                  | 1.435                                  | [5]        |
| CVN-NH <sub>3</sub> /CC               | 40                                  | 1.493                                  | [6]        |
| Fe <sub>2</sub> Ni <sub>2</sub> N NPA | 34                                  | 1.47                                   | [7]        |
| Co-Mo-N@Ag                            | 54                                  | 1.464                                  | [8]        |
| Mo <sub>2</sub> N-CoxN                | 105                                 | 1.477                                  | [9]        |
| Ni <sub>3</sub> FeN-NPs               | 59                                  | 1.471                                  | [10]       |
| NiMoN-550                             | 94                                  | 1.525                                  | [11]       |
| Ru-NiFe-P                             | 73.6                                | 1.471                                  | [12]       |

**Table S3** Comparison of the OER performances reported of other previously reported electrocatalysts in 1 M KOH + seawater.

| Catalysts                                   | Overpotential (mV) @ 10mA cm <sup>-2</sup> | References |
|---------------------------------------------|--------------------------------------------|------------|
| Fe-Ni-N-O                                   | 190                                        | This work  |
| NiFe LDH                                    | 296                                        | [13]       |
| S,<br>P-(Ni,Mo,Fe)OOH/NiMoP                 | 297                                        | [14]       |
| CoP x @FeOOH                                | 337                                        | [15]       |
| Ni <sub>3</sub> S <sub>2</sub> @NiFe PBA    | 336                                        | [16]       |
| Ni <sub>x</sub> B/B <sub>4</sub> C/B-CPR/NF | 350                                        | [17]       |
| NiMoN                                       | 369                                        | [18]       |
| B-Co <sub>2</sub> Fe LDH                    | 376                                        | [19]       |
| S-(Ni,Fe)OOH                                | 398                                        | [20]       |
| S-Cu <sub>2</sub> O-CuO                     | 420                                        | [21]       |

**Table S4** Comparison of the HER performances of reported other previously reported electrocatalysts in 1 M KOH.

| Catalysts                             | Tafel slope (mVdec <sup>-1</sup> ) | Overpotential (mV) @ 10mA cm <sup>-2</sup> | References |
|---------------------------------------|------------------------------------|--------------------------------------------|------------|
| Ru/Fe-Ni-N-O                          | 91                                 | 42                                         | This work  |
| CoMoNx-500<br>NSAs/NF                 | 133.5                              | 91                                         | [3]        |
| FeNi <sub>3</sub> N/NF                | 98                                 | 75                                         | [5]        |
| CVN-NH <sub>3</sub> /CC               | 98                                 | 118                                        | [6]        |
| Fe <sub>2</sub> Ni <sub>2</sub> N-NPA | 101                                | 110                                        | [7]        |
| Co-Mo-N@Ag                            | 73                                 | 90                                         | [8]        |
| N-NiCoP/NCF                           | 46                                 | 238                                        | [9]        |
| Ni <sub>3</sub> FeN-NPs               | 58.3                               | 29                                         | [10]       |
| NiMoN-550                             | 79                                 | 89                                         | [11]       |



**Table S5** Comparison of the water splitting performances in 1 M KOH solution.

| <b>Cathodic catalysts</b>                     | <b>Anodic catalysts</b>                       | <b>Current density<br/>/ mA cm<sup>-2</sup></b> | <b>Voltages / V</b> | <b>References</b> |
|-----------------------------------------------|-----------------------------------------------|-------------------------------------------------|---------------------|-------------------|
| Ru/Fe-Ni-N-O                                  | Fe-Ni-N-O                                     | 10                                              | 1.50                | This work         |
| CVN-NH <sub>3</sub> /CC                       | CVN-NH <sub>3</sub> /CC                       | 10                                              | 1.64                | [6]               |
| Fe <sub>2</sub> Ni <sub>2</sub> N NPA         | Fe <sub>2</sub> Ni <sub>2</sub> N NPA         | 10                                              | 1.65                | [7]               |
| CoMoO <sub>4</sub> /NF                        | CoMoO <sub>4</sub> /NF                        | 10                                              | 1.86                | [22]              |
| NiCo <sub>2</sub> S <sub>4</sub> NW-NF        | NiCo <sub>2</sub> S <sub>4</sub> NW-NF        | 10                                              | 1.68                | [23]              |
| NiCo <sub>2</sub> N                           | NiCo <sub>2</sub> N                           | 10                                              | 1.70                | [24]              |
| NiMoN-550                                     | NiMoN-550                                     | 10                                              | 1.596               | [11]              |
| Co-Mo <sub>2</sub> N                          | Co-Mo <sub>2</sub> N                          | 10                                              | 1.576               | [25]              |
| Co-Mo <sub>2</sub> C@NC                       | Co-Mo <sub>2</sub> C@NC                       | 10                                              | 1.830               | [26]              |
| Ni <sub>3</sub> FeN-NPs                       | Ni <sub>3</sub> FeN-NPs                       | 10                                              | 1.81                | [10]              |
| NiCo <sub>2</sub> S <sub>4</sub> @NiFe<br>LDH | NiCo <sub>2</sub> S <sub>4</sub> @NiFe<br>LDH | 10                                              | 1.61                | [27]              |

## References:

- 1 J. Li, Y. Zhao, A. Wu and Y. Wang, *Int. J. Electrochem. Sci*, 2019, **14**, 7582-7593.
- 2 T. Shi, J.-Q. Sun, X.-W. Wang, Q.-K. He, J.-W. Si, D.-R. Wang, K. Xie and W.-S. Li, *Vacuum*, 2022, **24**, 111216.
- 3 S. Yang, H. Guan, Y. Zhong, J. Quan, N. Luo, Q. Gao, Y. Xu, F. Peng, S. Zhang and Y. Fang, *Chem. Eng. J.*, 2021, **405**, 126231.
- 4 Y. Wang, C. Xie, D. Liu, X. Huang, J. Huo and S. Wang, *ACS Appl. Mater. Interfaces*, 2016, **8**, 18652-18657.
- 5 B. Zhang, C. Xiao, S. Xie, J. Liang, X. Chen and Y. Tang, *Chem. Mat.*, 2016, **28**, 6934-6941.
- 6 S. Dutta, A. Indra, Y. Feng, H. Han and T. Song, *Appl. Catal. B-Environ*, 2019, **241**, 521-527.
- 7 M. Jiang, Y. Li, Z. Lu, X. Sun and X. Duan, *Inorg. Chem. Front.*, 2016, **3**, 630-634.
- 8 F. Jiao, J. Wang, Y. Lin, J. Li, X. Jing and Y. Gong, *Appl. Surf. Sci*, 2021, **553**, 149440.
- 9 R. Zhang, J. Huang, G. Chen, W. Chen, C. Song, C. Li and K. Ostrikov, *Appl. Catal. B-Environ*, 2019, **254**, 414-423.
- 10 H. Guo, A. Wu, Y. Xie, H. Yan, D. Wang, L. Wang and C. Tian, *J. Mater. Chem. A*, 2021, **9**, 8620-8629.
- 11 Q. Chen, R. Wang, M. Yu, Y. Zeng, F. Lu, X. Kuang and X. Lu, *Electrochim. Acta*, 2017, **247**, 666-673.
- 12 Z. Yin, Y. Sun, C. Zhu, C. Li, X. Zhang and Y. Chen, *J. Mater. Chem. A*, 2017, **5**, 13648-13658.
- 13 M. Ning, L. Wu, F. Zhang, D. Wang, S. Song, T. Tong, J. Bao, S. Chen, L. Yu and Z. Ren, *Mater. Today Phys.*, 2021, **19**, 100419.
- 14 H. Chen, Y. Zou, J. Li, K. Zhang, Y. Xia, B. Hui and D. Yang, *Appl. Catal. B-Environ*, 2021, **293**, 120215.
- 15 L. Wu, L. Yu, B. McElhenny, X. Xing, D. Luo, F. Zhang, J. Bao, S. Chen and Z. Ren, *Appl. Catal. B-Environ*, 2021, **294**, 120256.
- 16 X. Luo, P. Ji, P. Wang, X. Tan, L. Chen and S. Mu, *Adv. Sci.*, 2022, **9**, 2104846.
- 17 J. Li, Y. Wang, H. Gao, S. Song, B. Lu, X. Tian, S. Zhou, Y. Yuan and J. Zang, *ChemSusChem*, 2021, **14**, 5499-5507.
- 18 L. Yu, Q. Zhu, S. Song, B. McElhenny, D. Wang, C. Wu, Z. Qin, J. Bao, Y. Yu and S. Chen, *Nat. Commun*, 2019, **10**, 1-10.
- 19 L. Wu, L. Yu, Q. Zhu, B. McElhenny, F. Zhang, C. Wu, X. Xing, J. Bao, S. Chen and Z. Ren, *Nano Energy*, 2021, **83**, 105838.
- 20 L. Yu, L. Wu, B. McElhenny, S. Song, D. Luo, F. Zhang, Y. Yu, S. Chen and Z. Ren, *Energy Environ. Sci.*, 2020, **13**, 3439-3446.
- 21 T. ul Haq and Y. Haik, *Catal. Today*, 2022, **400**, 14-25.
- 22 S.H. Kazemi, M. Tabibpour, M.A. Kiani and H. Kazemi, *RSC Adv.*, 2016, **6**, 71156-71164.
- 23 A. Sivanantham, P. Ganesan and S. Shanmugam, *Adv. Funct. Mater*, 2016, **26**, 4661-4672.
- 24 L. Shen, S. Tang, L. Yu, Q. Huang, T. Zhou, S. Yang, H. Yu, H. Xiong, M. Xu and X. Zhong, *J. Solid State Chem.*, 2022, **314**, 123434.
- 25 X. Shi, A. Wu, H. Yan, L. Zhang, C. Tian, L. Wang and H. Fu, *J. Mater. Chem. A*, 2018, **6**, 20100-20109.
- 26 X. Lang, M.A. Qadeer, G. Shen, R. Zhang, S. Yang, J. An, L. Pan and J.-J. Zou, *J. Mater. Chem. A*, 2019, **7**, 20579-20583.
- 27 J. Liu, J. Wang, B. Zhang, Y. Ruan, L. Lv, X. Ji, K. Xu, L. Miao and J. Jiang, *ACS Appl. Mater. Interfaces*, 2017, **9**, 15364-15372.
